# Supplementary material for: Interface cross-linked polymeric micelles with mixed coronal chains prepared by RAFT polymerization at the interface
Source: Royal Society of Chemistry journal article supplement (doi:10.1039/c2sm26362a), 2012-01-01
Supplement: c2sm26362a.pdf [file c2sm26362a.pdf]

**Fig. S5** The standard absorption curve of RAFT CTA recorded at 300 nm, which was made by measuring known amount of RAFT CTA in THF.
